# Supplementary material
Source: publisher figshare collection journal article supplement (https://acs.figshare.com/ndownloader/files/24310468)

## Supporting Information

### Exploration of the reactivity of heteroatomic compounds contained in vacuum gas oils during hydrotreatment using FT-ICR MS

Julie Guillemant<sup>†</sup>, Alexandra Berlioz-Barbier<sup>\*†</sup>, Luis P. de Oliveira<sup>†</sup>, Florian Albrieux<sup>†</sup>, Marion Lacoue-Nègre<sup>†</sup>, Ludovic Duponchel<sup>‡</sup> and Jean-François Joly<sup>†</sup>

<sup>†</sup> IFP Energies nouvelles, Rond-Point de l'Echangeur de Solaize, BP 3 - 69360 Solaize, France

<sup>‡</sup> Univ. Lille, CNRS, UMR 8516 - LASIRE – Laboratoire de Spectrochimie Infrarouge et Raman, F-59000 Lille, France

\* Correspondence should be addressed to Dr. Alexandra Berlioz-Barbier

[Alexandra.berlioz-barbier@ifpen.fr](mailto:Alexandra.berlioz-barbier@ifpen.fr)

#### Table of contents

| Figure/Table                                                                                                 | Reference | Page |
|--------------------------------------------------------------------------------------------------------------|-----------|------|
| Additional informations about the considered samples                                                         | Table S1  | S-2  |
| N1[H] DBE=f(#C) plots in ESI(-) mode                                                                         | Figure S1 | S-3  |
| N1[H] DBE=f(#C) plots in ESI(+) mode                                                                         | Figure S2 | S-4  |
| Evolution of the relative intensities of the DBE and #C of the N1O1[H] compounds of the feeds in ESI(-) mode | Figure S3 | S-5  |
| O1N2[H] and O2N1[H] DBE=f(#C) plots in ESI(-) mode                                                           | Figure S4 | S-6  |
| O1N1[H] DBE=f(#C) plots in ESI(+) mode                                                                       | Figure S5 | S-7  |
| O1S1[Na] compounds for the different feedstocks and O1S1[H] for the hydrotreated samples in ESI(+) mode.     | Figure S6 | S-8  |
| N1S1[H] compounds for the different feeds in ESI(+) mode                                                     | Figure S7 | S-9  |
| O1[H] compounds for the different feeds in ESI(-) mode                                                       | Figure S8 | S-10 |
| O2[H] compounds for the different feeds in ESI(-) mode                                                       | Figure S9 | S-11 |

**Table S1: Additional informations about the considered samples. NA: Not available**

| Sample | Type                                        | Total aromatics<br>(% w/w) by UV<br><i>Ref. method:</i><br><i>ASTM D2269</i> | Oxygen content<br>(% w/w) by IR<br><i>Ref. method:</i><br><i>MLE-MO-LAB-048</i> |
|--------|---------------------------------------------|------------------------------------------------------------------------------|---------------------------------------------------------------------------------|
| VGO 1  | SRVGO – Safaniya                            | 47                                                                           | 0.18                                                                            |
| VGO 2  | SRVGO – Arabian Light & Irak                | 51                                                                           | NA                                                                              |
| VGO 3  | 80% SRVGO 1 + 20% GO Safaniya               | 47                                                                           | 0.19                                                                            |
| HDT 1a | HDT from VGO 1<br><i>Middle temperature</i> | 48                                                                           | 0.18                                                                            |
| HDT 1b | HDT from VGO 1<br><i>High temperature</i>   | 46                                                                           | < 0.1                                                                           |
| HDT 2  | HDT from VGO 2<br><i>Middle temperature</i> | 44                                                                           | < 0.1                                                                           |
| HDT 3  | HDT from VGO 3<br><i>Middle temperature</i> | 45                                                                           | 0.25                                                                            |

Figure S1: DBE=f(#C) plots of N1[H] compounds in ESI(-) mode

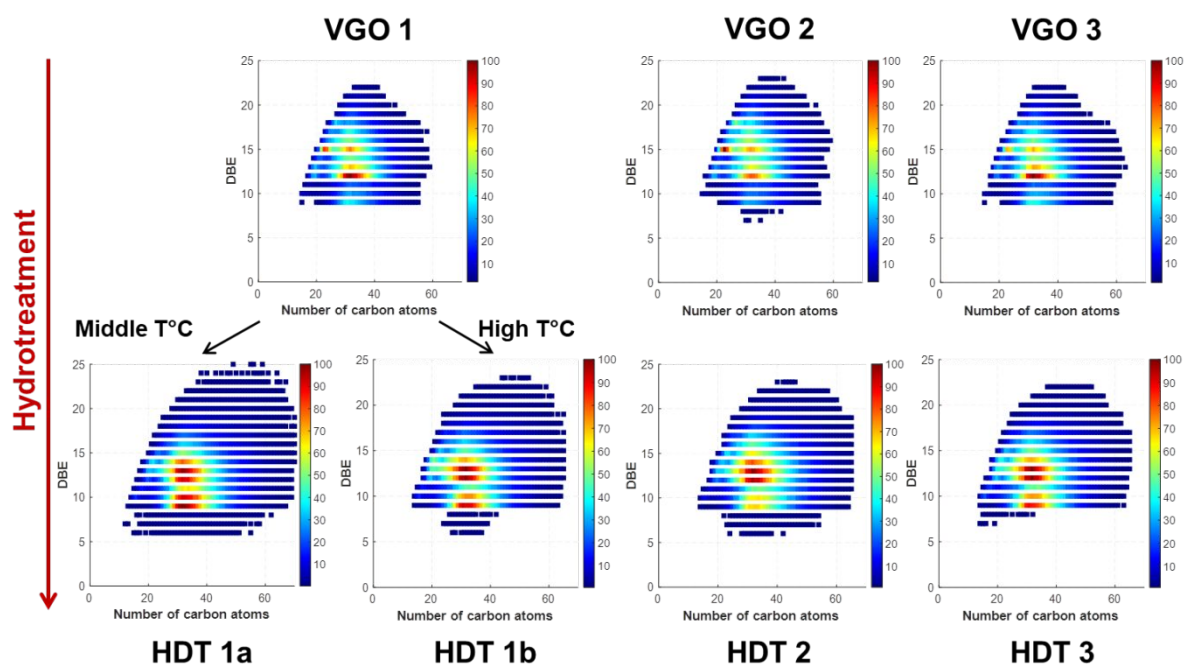

**Figure S2: DBE=f(#C) plots of N1[H] compounds in ESI(+) mode**

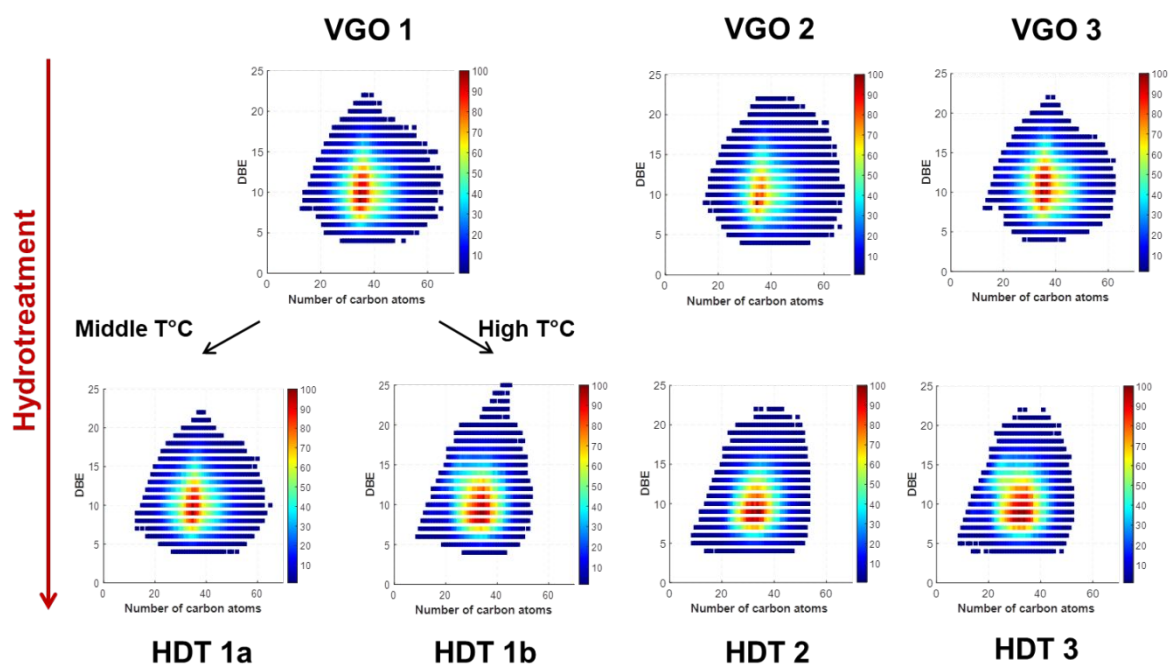

**Figure S3: Evolution of the relative intensities of the DBE (A) and the number of carbon atoms (B) of the N1O1[H] compounds for the different feeds in ESI(-) mode.**

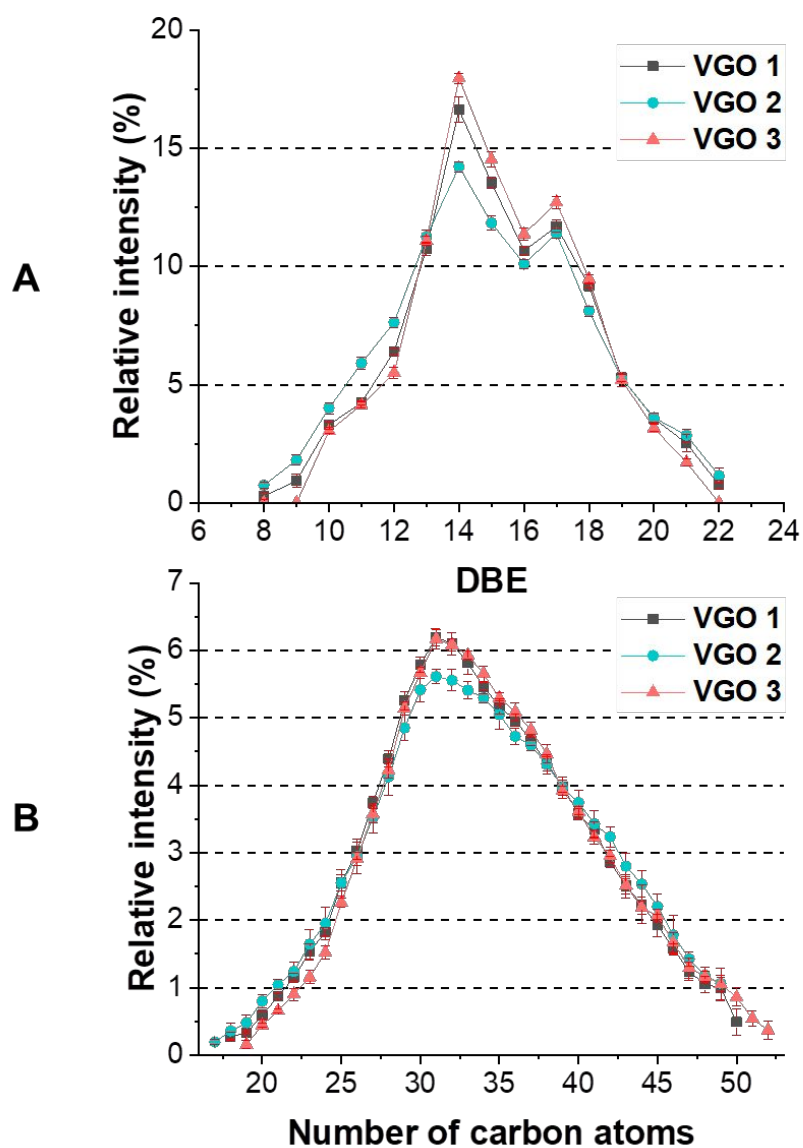

Figure S4: DBE=f(#C) plots of O1N2[H] and N1O2[H] compounds in the feeds

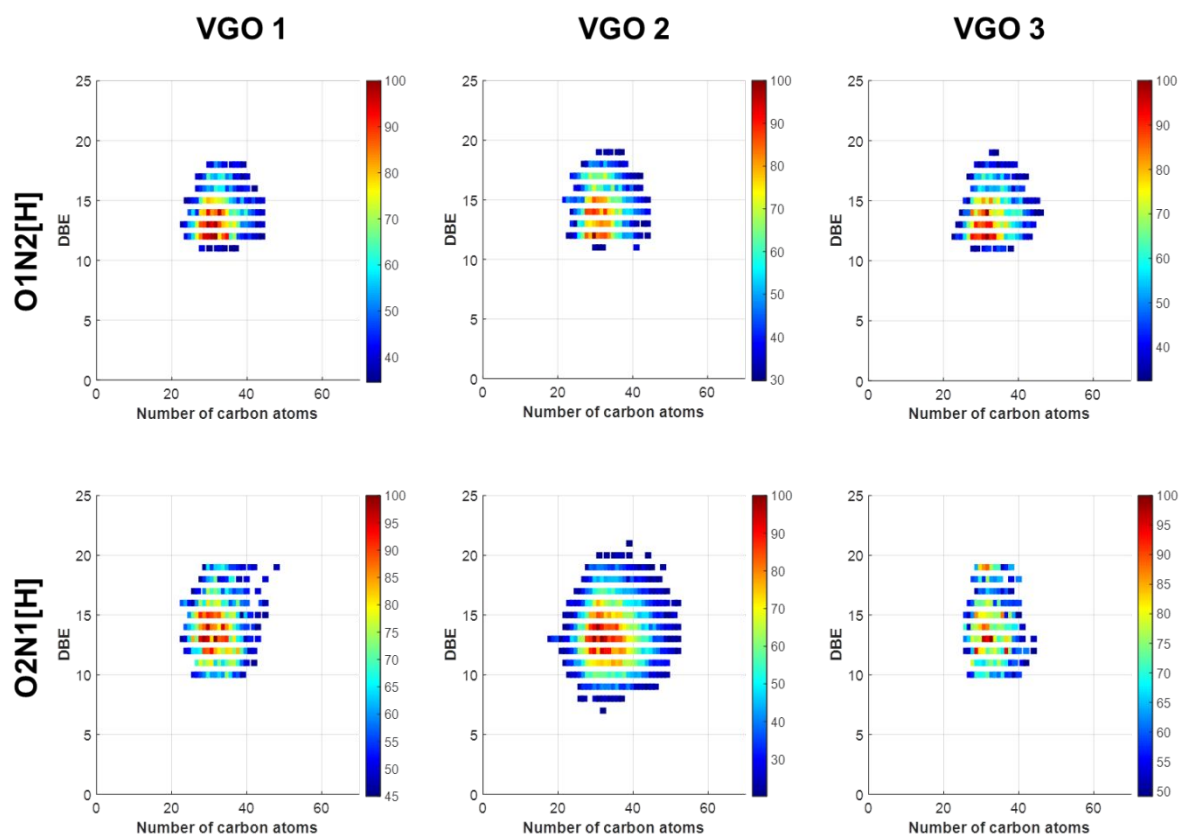

**Figure S5: DBE=f(#C) plots of O1N1[H] compounds in ESI(+) mode**

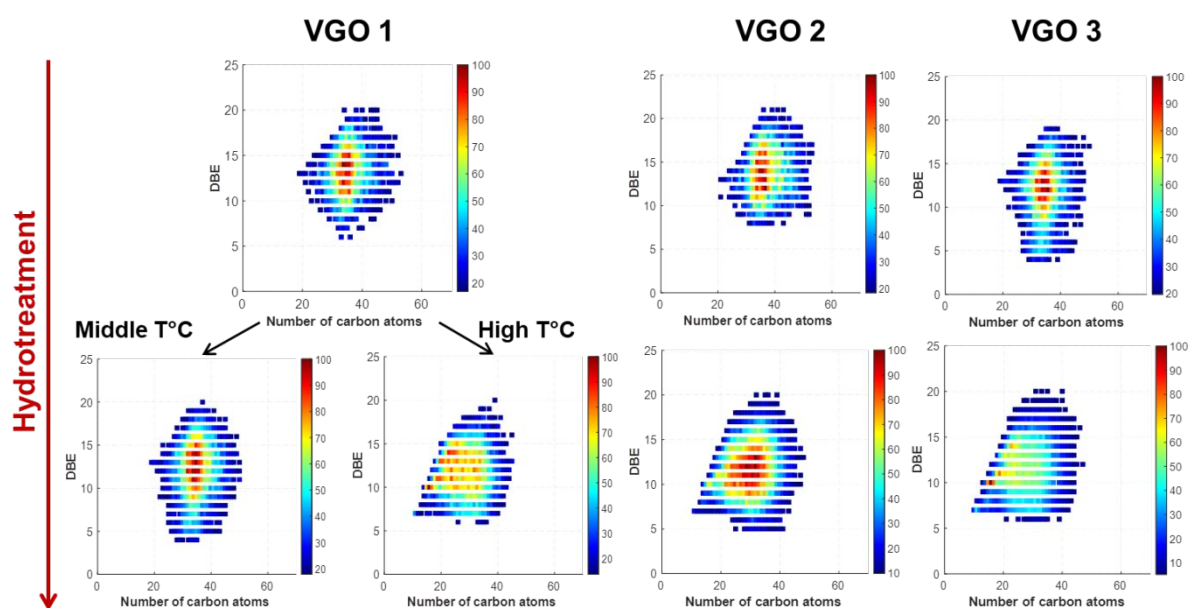

**Figure S6: Evolution of the relative intensities of the DBE (A) and the number of carbon atoms (B) of the O1S1[Na] compounds for the different feedstocks and O1S1[H] for the hydrotreated samples in ESI(+) mode.**

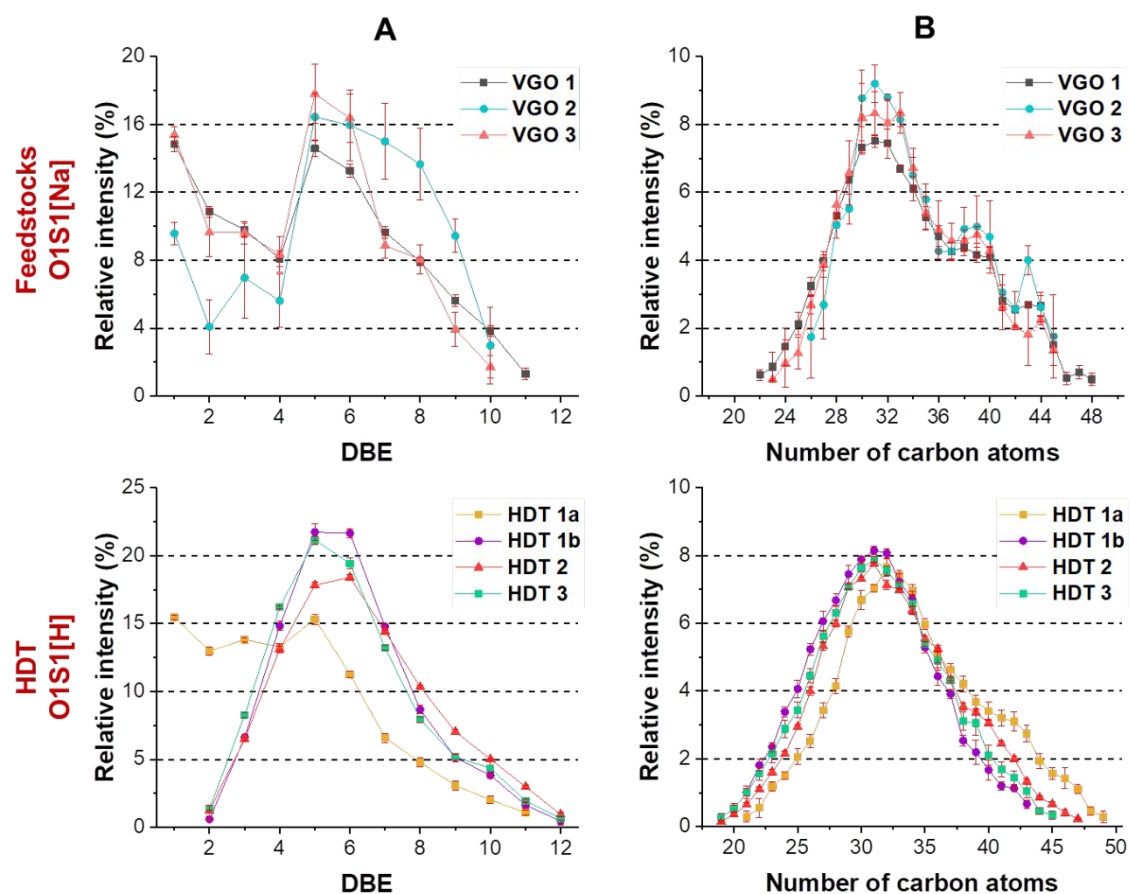



**Figure S7: Evolution of the relative intensities of the DBE (A) and the number of carbon atoms (B) of the N1S1[H] compounds for the different feeds in ESI(+) mode.**

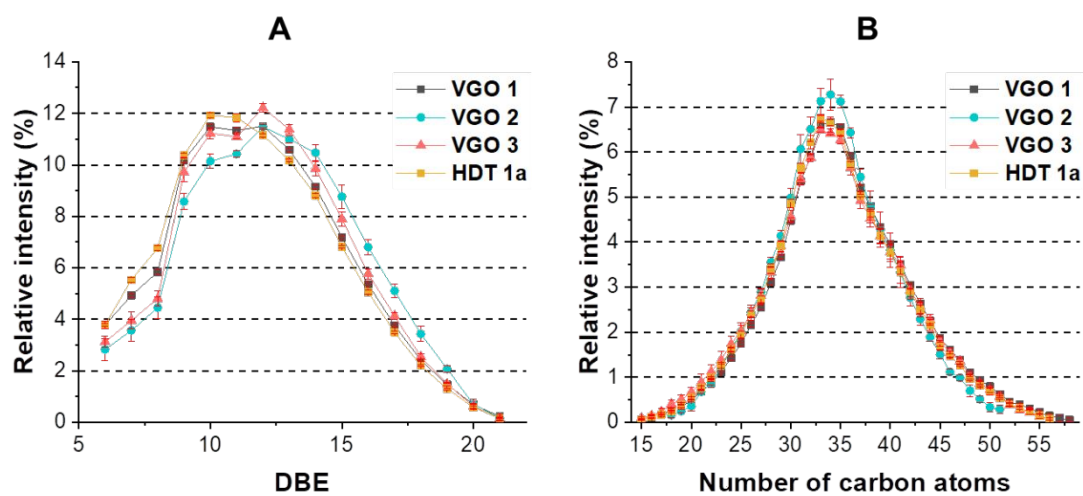

**Figure S8: Evolution of the relative intensities of the DBE (A) and the number of carbon atoms (B) of the O1[H] compounds for the different feeds and hydrotreated samples in ESI(-) mode.**

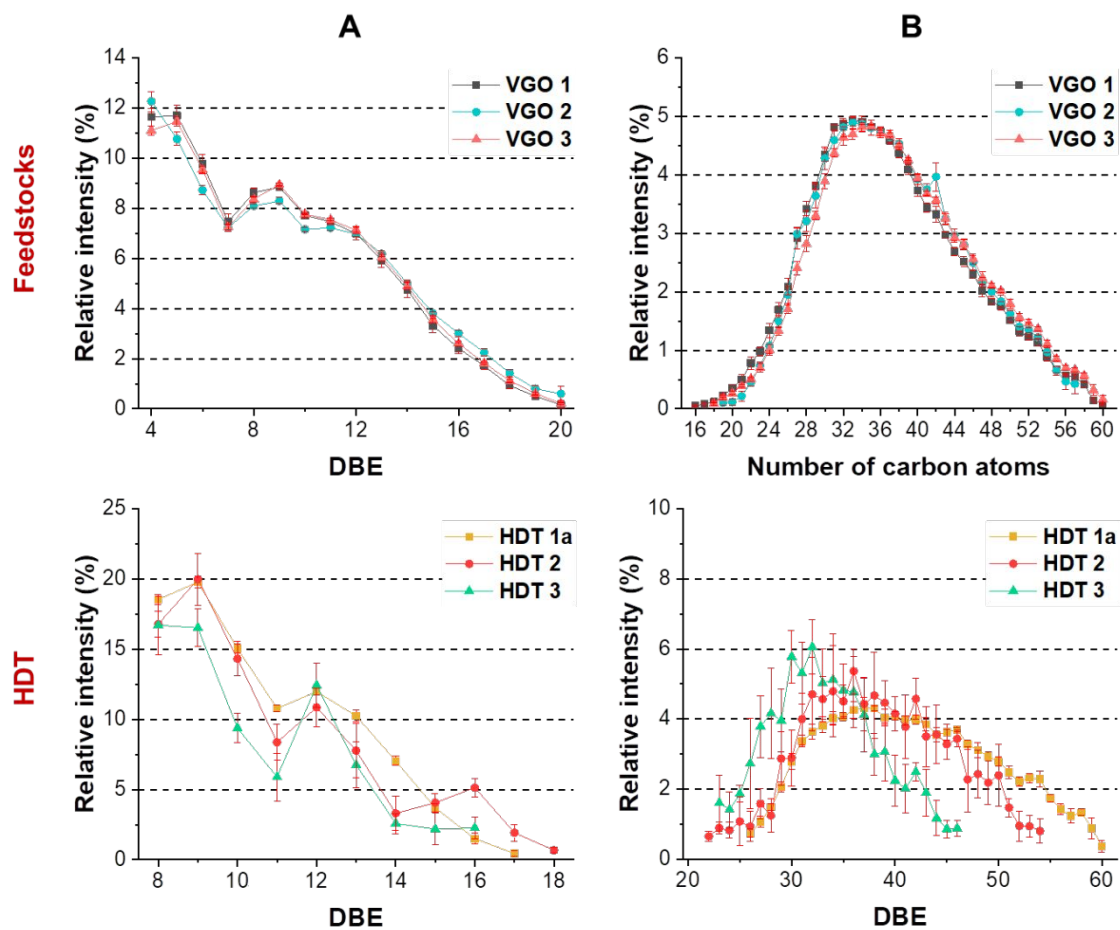

**Figure S9: Evolution of the relative intensities of the DBE (A) and the number of carbon atoms (B) of the O2[H] compounds for the different feeds in ESI(-) mode.**

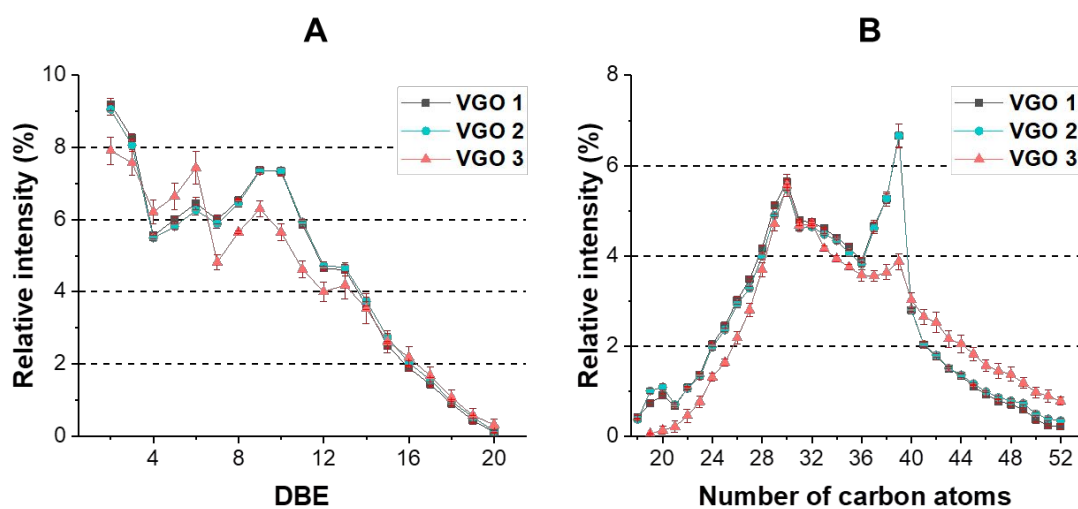

Supplement: Supplementary file 1 [file 24310468]
